9 **Abstract**

10 Big brown bats emit wideband frequency modulated (FM) ultrasonic pulses for echolocation.  
11 They perceive target range from echo delay and target size from echo amplitude. Their sounds  
12 contain two prominent down-sweeping harmonic sweeps (FM1, ~55-22 kHz; FM2, ~100-55  
13 kHz), which are affected differently by propagation out to the target and back to the bat. FM2 is  
14 attenuated more than FM1 during propagation. Bats anchor target ranging asymmetrically on the  
15 low frequencies in FM1, while FM2 only contributes if FM1 is present as well. These  
16 experiments tested whether the bat's ability to discriminate target size from the amplitude of  
17 echoes is affected by selectively attenuating upper or lower frequencies. Bats were trained to  
18 perform an echo amplitude discrimination task with virtual echo targets 83 cm away. While echo  
19 delay was held constant and echo amplitude was varied to estimate threshold, either lower FM1  
20 frequencies or higher FM2 frequencies were attenuated. The results parallel effects seen in echo  
21 delay experiments; bats' performance was significantly poorer when the lower frequencies in  
22 echoes were attenuated, compared to higher frequencies. The bat's ability to distinguish between  
23 virtual targets at the same simulated range from echoes arriving at the same delay indicates a  
24 high level of focused attention for perceptual isolation of one and suppression of the other.

## 25 I. INTRODUCTION

26 Big brown bats (*Eptesicus fuscus*) are North American insectivores that navigate and forage  
27 using echolocation to build a perceptual image of the surfaces and environment around them.  
28 Their echolocation calls are wideband, frequency-modulated (FM) pulses ranging in duration  
29 from 0.6 ms to 20 ms, and sweeping downwards in frequency from around 100 kHz to around 22  
30 kHz (Griffin, 1958; Simmons and Stein, 1980; Surlykke and Moss, 2000). The downward FM  
31 sweep consists of two to three harmonics: the second harmonic (FM2) sweeps downward from  
32 ~100 kHz to ~55 kHz, and the first harmonic (FM1) sweeps downward from ~55 kHz to ~22  
33 kHz. A segment of the third harmonic (FM3) often is present, too, sweeping downward from  
34 ~110 kHz to ~80 kHz, but it is weaker. The frequencies above 50 kHz (i.e. above FM1) become  
35 very quickly attenuated by the atmosphere during propagation from the bat to a target and back  
36 (Griffin, 1958; Lawrence and Simmons, 1982; Stilz and Schnitzler, 2012). Beyond distances of a  
37 few meters, echoes contain most of their energy in FM1. Several experiments have demonstrated  
38 the bat's emphasis of FM1 for perceiving target range from echo delay (see below; Moss and  
39 Schnitzler, 1989; Bates and Simmons, 2010; Bates *et al.*, 2011; Stamper *et al.*, 2009). The echo  
40 stimuli used in these previous experiments were varied in delay, providing a time offset between  
41 the positive and negative virtual targets that likely helped the bat to isolate the desired object for  
42 perception. In the new experiments reported here, we explore the relative roles of FM1 and FM2  
43 in mediating the bat's ability to discriminate the amplitude of echoes for target size. Here, the  
44 bats were presented with virtual targets 83 cm away, from echoes that arrived at the same delay  
45 of 4.8 ms. The simultaneity of echo arrival from both positive and negative stimuli adds the  
46 challenge of clutter suppression because each set of echoes arriving at the same delay could  
47 interfere with perception of the other set.

48 Big brown bats perceive the egocentric distance of acoustically-reflecting surfaces from  
49 echo delay with very high accuracy (Simmons, 1973; Moss and Schnitzler, 1989; Simmons *et*  
50 *al.*, 1990). The wideband structure of their echolocation pulses, which cover a large number of  
51 frequencies in a short period of time, allows for more accurate distance measurements than do  
52 narrowband signals (Simmons, 1973; Simmons *et al.*, 1975, 2004; Simmons and Stein, 1980;  
53 Boonman and Ostwald, 2007; Denny, 2007; Jones, 2008; Ming *et al.*, 2021). The bats' accuracy  
54 in perceiving a target's egocentric distance (perceived from the time delay between outgoing  
55 pulses and returning echoes) has been investigated using psychophysical tasks (Moss and  
56 Schnitzler, 1989; Simmons *et al.*, 2004; Stamper *et al.*, 2009; Bates and Simmons, 2010; Bates *et*  
57 *al.*, 2011) in which bats are trained to detect and discriminate virtual echoes based on pulse-echo  
58 delay, or to determine whether the pulse-echo delay changes from pulse-to-pulse (i.e. the target  
59 echo's delay 'jitters' back and forth). Once bats have been trained to reliably discriminate two  
60 echoes (a target, rewarded, echo from a non-target echo), the echoes can be modified and the  
61 change in discrimination performance (if any) measured. With this paradigm, researchers can  
62 make assumptions as to how the bats' perception changes as a function of the acoustic content of  
63 incoming echoes. These studies quantified the delay resolution of FM echolocating bats (~10 ns)  
64 and revealed an ecologically relevant asymmetry in the perceptual role of higher and lower  
65 frequencies in determining pulse-echo delay.

66 Simmons *et al.* (2004) trained big brown bats to discriminate echoes with a set pulse-echo  
67 delay from echoes whose temporal delay jittered back and forth on subsequent echo  
68 presentations. When echoes were unfiltered, the bats could discriminate a non-jittering echo from  
69 a jittering echo when the jitter delay was at least 10 ns – equivalent to a change in distance of  
70 0.0035 mm. When echoes were increasingly highpass filtered (from 15 – 35 kHz, in 5 kHz

71 increments), discrimination thresholds steadily increased eightfold to 80 ns. Bates and Simmons  
72 (2010) replicated this effect in a non-jitter delay discrimination task. Big brown bats were instead  
73 trained to discriminate two simultaneous echoes separated by 800  $\mu$ s (corresponding to 14 cm of  
74 physical distance between targets). As more of the lowest frequencies in the target echo were  
75 progressively highpass filtered, the bats' discrimination performance progressively worsened.  
76 When echoes were filtered to only include frequencies between 66-90 kHz (i.e. FM1 was fully  
77 removed), the bats' performance decreased below 50%, indicating that they switched to  
78 responding to the unfiltered echo as the target echo – despite it not being at the echo delay to  
79 which they had been trained to respond. These results suggest that without the lowest band of  
80 frequencies in an echo, the bat does not perceive the stimulus as an echo, and is thus unable to  
81 calculate pulse-echo delay.

82 In contrast to FM1, the higher frequencies of FM2 (~100-55 kHz) are neither necessary nor  
83 sufficient for successful perception of echoes; that is, bats can still perform discrimination tasks  
84 if FM2 is absent, but not if echoes consist of *only* FM2 (Moss and Schnitzler, 1989; Stamper et  
85 al., 2009). Moss and Schnitzler (1989) trained big brown bats to discriminate between an echo  
86 with a constant delay and a jitter-delay echo, where the jitter delay was between 0.4 – 4.8  $\mu$ s.  
87 When echoes were highpass filtered at 40 kHz, requiring the bats to discriminate echo delay  
88 using primarily FM2, the bats “failed to perform” and “refused to make a choice” (p. 389). Thus,  
89 performance was dependent on the presence of FM1. Bates and Simmons (2010) found similar  
90 results – the bats' performance in a discrimination task did not worsen when echoes were filtered  
91 to only include FM1.

92 It is not the case, however, that the frequencies contained in FM2 are not perceptually  
93 informative to the bat. Stamper et al. (2009) found that, when FM2 was split from FM1 and

94 delayed in time (relative to FM1), the bats made more errors when a non-target echo coincided  
95 with the delay of that split-harmonic echo. These results suggest that the upper frequencies of  
96 FM2 influence the bat's perception of echo delay (or distance from the bat) if they are present,  
97 but the bat is also able to perceive distance using only the lower frequencies of FM1, if  
98 necessary. Additionally, delay-accuracy for split-harmonic echoes was overall worse than for  
99 harmonically-aligned echoes, suggested that temporal alignment of echo frequencies is required  
100 for highly accurate perception of echo delay.

101 Bates et al. (2011) ran a series of experiments showing that the upper frequencies of FM2  
102 affect echo perception in a more graded manner than the frequencies of FM1, which completely  
103 disrupt the bat's perception when absent. When FM2 of a non-target echo was not removed or  
104 delayed, but attenuated (i.e. weakened), delay discrimination performance approached 100%,  
105 suggesting that their temporal perception of the non-target had become defocused as a result of  
106 the attenuation of its higher frequencies. These results, along with those described above, outline  
107 a comprehensive perceptual clutter rejection mechanism which allows bats to perceive the object  
108 ensonified by the center of their echolocation beam with high temporal acuity, while  
109 simultaneously temporally defocusing more peripheral echoes (the more peripheral, the more  
110 defocused) so that these incoming peripheral echoes do not mask the bat's highly accurate delay  
111 percept of the center of the beam (Bates et al., 2011).

112 In the current experiment, we aimed to extend these previous results in a different perceptual  
113 discrimination context. Rather than using an echo-delay discrimination task, we tasked bats to  
114 discriminate virtual targets on the basis of amplitude, which corresponds to the perceived size of  
115 an ensonified object (Simmons and Vernon, 1971).

116

## 117 **II. METHODS**

### 118 **A. Animals**

119 Five adult big brown bats (named F., G., J., K., and M.; four females and one male) were  
120 trained for this experiment. They were wild-caught from barns or attics in Rhode Island under a  
121 state scientific collecting permit. Because they were wild caught, their ages are unknown beyond  
122 one year. Bats were housed in groups of 2-3 individuals in a temperature- and humidity-  
123 controlled colony room (22-25° C, 40-60% humidity) on a 12:12 reversed dark:light cycle.  
124 Individuals were identified by scannable microchips implanted subcutaneously in their upper  
125 backs over one month before the experiment began. They had unlimited access to vitamin-  
126 enriched water and received their daily food allotment (live mealworms, *Tenebrio larvae*) during  
127 experiments as rewards for correct performance. Bats were not food-deprived throughout the  
128 duration of the experiment and were maintained at healthy weights between 15.0 and 18.0 g. All  
129 procedures were approved by the Brown University Institutional Animal Care and Use  
130 Committee and are consistent with federal guidelines.

### 131 **B. Virtual target presentation system**

132 Bats were trained to complete a two-alternative forced-choice (2AFC) task which required  
133 them to choose the stronger (higher amplitude) of two ultrasonic echoes, or virtual targets. The  
134 task took place in an 8.3 m × 4.3 m × 2.7 m room lined with sound-absorbent foam (SONEX)  
135 on the ceiling and walls and artificial athletic turf on the floor to attenuate unwanted echoes. The  
136 2AFC platform was located on the room's midline, 5.4 m from the back of the room (the  
137 direction the platform faced), and at a height of 1.2 m from the floor. There was 1.2 m of empty  
138 space on either side of the platform, and 4.0 m of empty space to the front of the platform, so as  
139 to avoid extraneous room echoes reaching the bats at similar time delays as the experimental

140 stimuli. The room was illuminated with dim, long-wavelength red light to allow for bat handling  
141 and video monitoring by the experimenters.

142 Each bat was trained to sit at the base of an elevated Y-platform and broadcast its  
143 echolocation calls towards the end of the platform (Fig. 1). At each end of the platform's two  
144 arms was an ultrasonic microphone (Knowles Electronics FG-3329), separated from the other by  
145 11 cm and 29° (relative to the point at which the bat crawls onto the platform). These  
146 microphones recorded the bat's echolocation calls and immediately delivered them back to the  
147 bat as virtual echoes from two ultrasonic speakers (Tucker-Davis ES1, 3.8 cm diameter),  
148 mounted 1.4 m from the edge of the platform (Fig. 1). The two speakers were placed 86 cm and  
149 35° apart, with each speaker aimed directly at its corresponding platform arm. Ultrasonic calls  
150 recorded by the left platform microphone were routed to the left speaker, and vice versa. Each  
151 speaker was mounted 1.4 m from the edge of the platform to create a time delay between the bat  
152 emitting echolocation calls and the bat receiving the corresponding delivered echoes. This  
153 distance, combined with the distance that the echolocation calls had to travel to reach the  
154 platform microphones, resulted in a total pulse-echo delay of approximately 4.84 ms,  
155 corresponding to a pair of virtual targets presented at a distance of ~83 cm from the point at  
156 which the bat walks onto the platform (Fig 1).

157 The emitted calls recorded by each platform microphone were highpass filtered at 10 kHz  
158 (ThorLabs EF121 HP filter) to remove background noise, routed to a microphone preamplifier  
159 (RME 4-channel Quadmic preamplifier), and then into a custom-built switchbox (Fig. 1, "S+/S-  
160 switch") which designated each of the two audio channels carrying the bat's calls (left and right  
161 platform microphones) as either the positive stimulus (S+) or the negative stimulus (S-). The  
162 switchbox thus determined the direction of the S+ and S- stimuli for each trial (if the switch was



163 positioned to the *right*, the *right* speaker emitted S+ and the *left* speaker emitted S-, and vice  
164 versa if the switch was positioned to the left). After routing through the switchbox, both stimulus  
165 channels were then further amplified, filtered, and attenuated, with parameters varying by  
166 experimental condition (see Experimental stimuli section). Amplification of each channel was  
167 accomplished with two preamplifier units (FMR Audio, RNP8380), filtering of either the S+ or  
168 the S- channel was accomplished using two consecutive analogue filters (Rockland Model 852  
169 Dual hi/lo filter, combined 96 dB/octave), and attenuation of each channel was accomplished  
170 with two attenuators (Tucker-Davis Technologies, PA5 programmable attenuator). All  
171 amplification and filtering equipment was located outside the experimental room. After S+ and  
172 S- channels were appropriately filtered and attenuated, they were again routed through the  
173 custom-built switchbox (Fig. 1, “Left/Right switch”) to re-designate the S+/S- channels as  
174 Left/Right audio channels for emission through their corresponding speaker. During training and  
175 data collection, the direction of S+ and S- was pseudorandomly varied from trial-to-trial  
176 according to a Gellermann (1933) schedule. After S+ and S- are assigned to a Left/Right speaker,  
177 both stimuli were routed to a two-channel speaker driver (Tucker-Davis Technologies, ED1  
178 electrostatic driver) and then emitted through their corresponding speaker in front of the  
179 platform. Each of the four audio channels described here (left and right platform microphones,  
180 left and right speakers) were also recorded on an audio recorder (Zoom F4, digitized at 192 kHz)  
181 to analyze the spectral content of calls emitted by the bat and the resulting echoes emitted by  
182 speakers.

183 The system was calibrated using a 2 ms-long, 2-harmonic FM sweep from 100-20 kHz (i.e.  
184 an artificial echolocation pulse) synthesized in Adobe Audition (2019) and generated at 2.0 V by  
185 a digital signal generator (Koolertron, JDS2600-60M). This signal was inserted into the system

186 in lieu of actual bat calls, and the strength of the emitted echoes from each individual speaker  
187 was calculated by placing an ultrasonic microphone (Brüel & Kjør Model 4135 1/4-inch) in the  
188 center of the platform facing the speakers. A calibration signal generated from the signal  
189 generator at 2.0 V was comparable in amplitude to the strongest bat calls emitted during the  
190 experiment (measured by oscilloscope during pilot trials), and resulted in echoes of 78 dB SPL at  
191 the platform, indicating that echoes reaching the platform were well above the hearing threshold  
192 of big brown bats (Koay et al., 1997). Calibration measurements were run with only one stimulus  
193 (S+ or S-) present in order to measure the amplitude of each stimulus individually, rather than  
194 the amplitude of both stimuli arriving at the platform at the same time. This calibration method  
195 was also used to measure the decrease in echo amplitude after echoes were high- or lowpass  
196 filtered, in order to compensate for the reduced acoustic energy present in echoes after filtering.

197

198 **FIG 1. Diagram of experimental setup.** A bat sitting on a Y-platform emits ultrasonic  
199 echolocation calls (red dashed lines; color online) which are picked up by two microphones (m)  
200 and simultaneously emitted from two ultrasonic loudspeakers (s) mounted at a distance of 1.4 m  
201 from the platform, to create two virtual targets 83 cm in front of the bat (S+ and S-, shown as call  
202 spectrograms). Labeled boxes indicate signal processing equipment used to amplify and filter  
203 each of the audio channels. Five bats were rewarded for walking (green arrow; color online) in  
204 the direction of the stronger of two echoes (S+, denoted by a darker spectrogram). Bats were not  
205 rewarded for walking in the direction of the weaker echo (S-, denoted by a weaker spectrogram).  
206 The direction (left or right) of the S+ and S- echoes was counterbalanced across trials according  
207 to a pseudorandomized schedule (Gellermann, 1933).

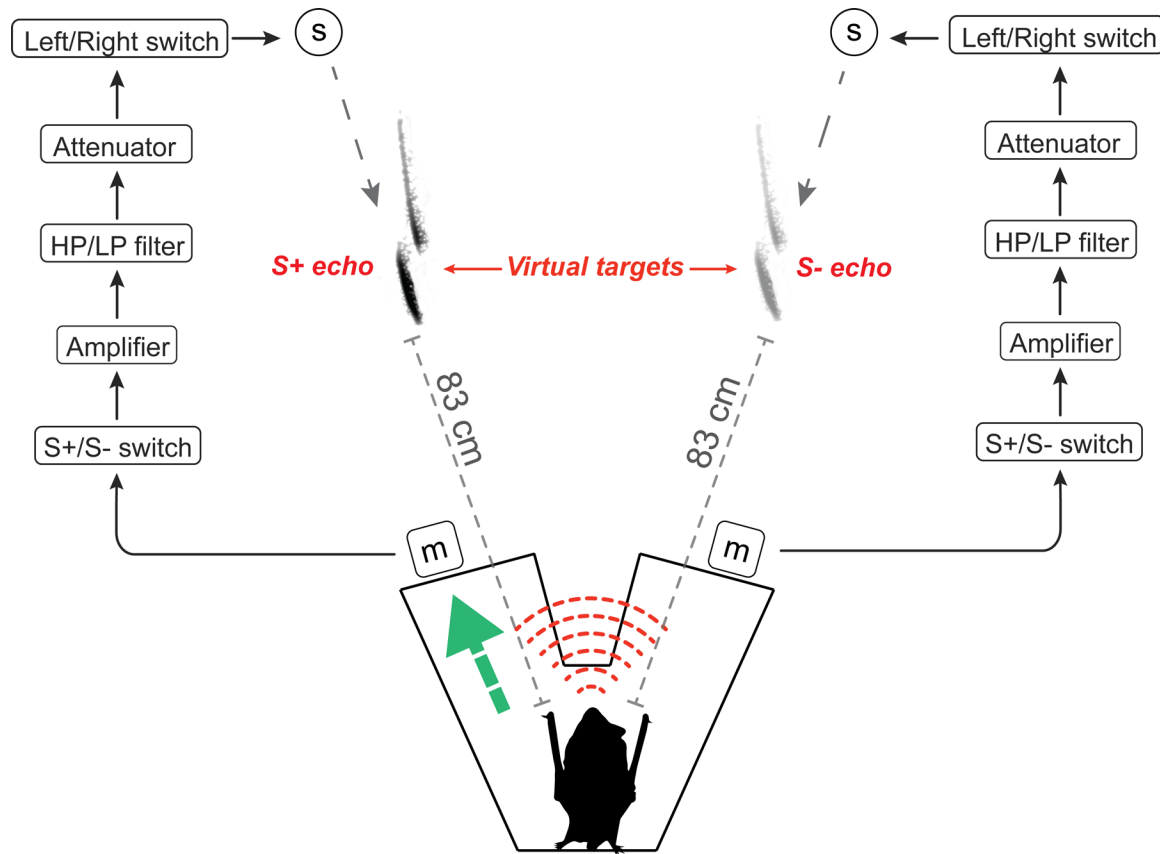

208

### 209 C. Training and data collection

210 Two experimenters were present on each day of training and data collection, and trials were  
211 run using a double-blind procedure. Experimenter 1 handled the bat on each trial and was blind  
212 to the experimental sequence and the correct choice for all trials. Experimenter 2 was positioned  
213 behind Experimenter 1, separated by an opaque felt screen, and monitored the bat's response via  
214 a ceiling-mounted black and white CCD video camera (DSP 15-CB22 1/3" sensor B/W camera),  
215 which provided a live bird's-eye view of the platform to a video monitor (Blackmagic Video  
216 Assist). Experimenter 2 controlled the left/right position of the positive (S+) and the negative  
217 (S-) stimuli according to a prearranged pseudorandomized sequence (Gellermann, 1933) and  
218 verbally informed Experimenter 1 if the bat's response was correct or incorrect after each trial.

219 Bats were trained 5 days a week to walk in the direction of S+. On each trial, the bat was  
220 rewarded with a piece of mealworm for walking down the arm of the platform which  
221 corresponded to the speaker delivering the S+ echo. If the bat walked down the arm  
222 corresponding to S-, a broadband ‘shh’ sound was made by Experimenter 1 to signal to the bat  
223 that it made an error, and the bat was held in the hand for a 5-sec interval before beginning the  
224 next trial. Training began with the S+ echo not attenuated (-0 dB on the corresponding Tucker-  
225 Davis attenuator) and the S- echo completely attenuated (-120 dB on the corresponding  
226 attenuator). Once a bat was able to correctly respond to (i.e. walk in the direction of) the S+ echo  
227 on 90% of trials in one day, the S- echo was introduced at the same overall pulse-echo delay as  
228 S+, but at -45 dB relative to S+. At this point, the bat had to distinguish between two echoes,  
229 both of which were present after each emitted echolocation call and at the same time delays (i.e.,  
230 the same distances from the bat), but which differed in their amplitude.

231 Over the course of 8-14 weeks of training (the amount of training required varied per bat),  
232 the attenuation of the S- echo (relative to the S+ echo) was gradually reduced for each bat,  
233 leading to smaller amplitude differences between the two stimuli. Once a bat demonstrated its  
234 ability to discriminate S+ and S- at the test amplitudes (i.e. the bat walked in the correct direction  
235 on  $\geq 75\%$  of trials on a given day) for two consecutive days, the amplitude of S- was increased by  
236 2-5 dB for that bat on the next day of training. The final two weeks of each bat’s training  
237 involved smaller S- amplitude changes (0.5-1.0 dB at a time) to avoid making the day-to-day  
238 changes in the task too difficult for the bat. This process continued until the attenuation of the S-  
239 echo relative to the S+ echo was small enough that the bat’s performance dropped *below* 75% for  
240 two consecutive days, indicating that the bat was no longer able to discriminate the two echoes  
241 well. For each individual bat, the (S+):(S-) amplitude difference which resulted in below 75%

242 correct performance was deemed the amplitude discrimination limit (ADL) for that bat. While  
243 75% correct performance is commonly used as the threshold for successful discrimination  
244 (Simmons, 1973), performance was variable and could not be held at exactly 75% from day-to-  
245 day. For this reason, attenuation differences were chosen that resulted in performance levels  
246 between 75% and 50% for each bat; this criterion avoided potential discrimination ceiling effects  
247 in the bats' performance and is what we have defined as the bats' ADL for the purposes of this  
248 experiment.

249 During training, each bat performed 10-50 trials per day (5-6 days per week). The number of  
250 trials a given bat performed on a given day was a function of the quantity of mealworms that bat  
251 was receiving as its daily food allotment and its experience with the task.

252 Once a bat reached its individual ADL during training, data collection began. There were  
253 five total experimental conditions, one of which was the "baseline" amplitude discrimination  
254 task – that bat's performance at its measured ADL. The other four conditions covered all  
255 permutations of S+/S- filtering: S+ highpass filtered (HP), S- highpass filtered, S+ lowpass (LP),  
256 and S- lowpass filtered. In all conditions the amplitude difference between S+ and S- was  
257 maintained at the same level as in the baseline amplitude discrimination condition for each  
258 individual bat, such that the only difference between stimuli from condition to condition was the  
259 spectral filtering of either S+ or S-. The order of conditions was randomized for each bat. Bats  
260 participated in the four experimental conditions involving filtered stimuli every other day, with  
261 intervening days consisting of the basic amplitude discrimination task at (or near) that bat's  
262 ADL. These intervening days of amplitude discrimination served to maintain the bats' initial  
263 training of responding to the stronger of two echoes over the course of data collection. To  
264 maintain the bats' robust amplitude discrimination training (acquired over 8-14 weeks of

265 training), but also avoid frustrating them (which can occur with difficult discrimination tasks),  
266 intervening days were conducted with the S+/S- amplitude difference either at the bat's ADL, or  
267 with S- further attenuated by 1-2 dB. These intervening days ensured that the bats completed the  
268 experimental discrimination tasks based on the amplitude difference between S+ and S-, and did  
269 not begin instead confounding any of the echo filtering conditions with food rewards.

270 Our goal was to collect 150 trials per bat in each condition, at a rate of 50 trials per day. This  
271 equates to three days of data collection per bat per condition, with one day of baseline amplitude  
272 discrimination between each day of data collection, to maintain their discrimination training.  
273 Unfortunately, data collection was halted by state-mandated stay-at-home orders precipitated by  
274 the COVID-19 pandemic, leading to an unequal number of trials across conditions. In the end,  
275 every condition contains data from at least three bats; in two conditions (S+ HP and S- LP) one  
276 of those bats did not reach 150 trials. Statistical power was calculated (G\*Power 3.1, 2021) to  
277 confirm that all conditions consisted of enough trials to ensure adequate statistical power above  
278 80% (with  $\alpha = 0.05$ ) for all statistical tests.

#### 279 **D. Experimental stimuli**

280 In the baseline amplitude discrimination condition, the stimuli that the bat received at the  
281 platform were spectrally and temporally identical to the echolocation calls recorded by the two  
282 platform microphones. The only aspect differentiating the S+ and S- echoes (i.e. the parameter  
283 the bats were trained to discriminate) was their amplitude, with non-target S- echoes being 3-6  
284 dB weaker than target echoes (as determined by the individual bat's ADL; see Results). In the  
285 four experimental conditions, either the S+ or S- echoes were also either highpass or lowpass  
286 filtered, while the amplitude of S- relative to S+ was maintained at the same level as in the  
287 baseline condition. The filtering of S+/S- was accomplished by routing either the S+ audio

288 channel or the S- audio channel through two Rockland filters (Model 852 Dual hi/lo filter) set to  
289 the same settings, resulting in a 96 dB/octave attenuation beginning at the frequencies specified  
290 on the filter. For the two conditions requiring highpass filtering, the filter was set at 15 kHz  
291 above the lowest frequency in the bat's echolocation calls; also known as the terminal frequency  
292 (TF) of the FM sweep. The TF of echolocation calls can vary between individual bats, so  
293 separate TFs were measured for each individual bat by visually inspecting the recorded  
294 spectrograms in Adobe Audition (2019). The mean TF for each bat was calculated by averaging  
295 the TF of all calls emitted in a single trial during that bat's first day in the baseline amplitude  
296 discrimination condition. For the two conditions requiring lowpass filtering, the filter was set at  
297 70 kHz for all bats. This frequency cutoff was chosen for all bats because the upper frequencies  
298 of big brown bat calls do not differ between individuals as drastically as the lowest frequencies;  
299 the upper frequencies extend into the call's second or third harmonic and decrease in attenuation  
300 gradually, rather than abruptly ending as they do at the TF of the bat's FM sweep. In contrast to  
301 the TF of a call, the presence or absence of these higher frequencies is more likely to be a factor  
302 of the strength of the emitted call, the distance the call has to travel, and the ensuing atmospheric  
303 attenuation, rather than a factor of any inter-individual differences in vocalization frequency.  
304 Moreover, the measurement of these highest frequencies depends largely on the sensitivity and  
305 sampling rate of the recording equipment used. Our recording sampling rate of 192 kHz made  
306 measurements above 96 kHz impossible, while the frequency responses of the ultrasonic  
307 microphones and speakers used begin to roll off above ~85 kHz. Ultimately, a 70 kHz lowpass  
308 limit was chosen because it resulted in a noticeable attenuation of a 10-15 kHz range at the upper  
309 limit of the emitted echoes, as judged by the spectrograms of the calibration signal and the bat

310 calls emitted during trials. Fig. 2 provides examples of how the attenuation and filtering settings  
311 modulated S+ and S- in different conditions (example signals shown from one bat, M.).

312 Because successful discrimination of echoes depended on small differences in amplitude,  
313 steps were taken to ensure that (S+):(S-) amplitude differences were maintained across  
314 conditions. Using the same calibration signal and microphone described above, we measured the  
315 decreases in stimulus amplitude caused by removing either upper or lower frequencies with  
316 analog filters. These slight decreases in amplitude as a result of filtering were then compensated  
317 for by increasing the amplitude of filtered echoes by the equivalent amount in each of the four  
318 conditions involving filtering.

319

320 **FIG 2. Example echolocation calls from one bat in three experimental conditions.** (A) An  
321 example waveform of a single call from bat M. in the baseline amplitude discrimination  
322 condition. The same call from the bat was recorded by the two platform microphones and  
323 emitted by the two speakers to create two echo stimuli: S+ (top waveform) is unfiltered and  
324 unattenuated, (~78 dB SPL at the bat), and S- (bottom waveform) is unfiltered but attenuated 3.0  
325 dB relative to S+. Small differences in waveform shape are due to the call being recorded by two  
326 separate microphones, each at slightly different angles from the bat's mouth at the time of call  
327 emission. (B) An example spectrogram of a single call (bat M.) in a lowpass (LP) filtering  
328 condition. LP filtering of the S+ echo at 70 kHz strongly attenuates the upper frequencies of the  
329 call's second harmonic (left spectrogram). The other stimuli, S-, is unfiltered but is still  
330 attenuated 3.0 dB relative to S+, as in the baseline amplitude discrimination condition (see  
331 Methods). (C) A single call (bat M.) in a highpass (HP) filtering condition. HP filtering  
332 attenuates the lower end of frequencies (left spectrogram, HP at 40 kHz for this individual bat;



333 see Methods and Results). The S- echo is unfiltered but remains attenuated by 3.0 dB relative to  
334 S+ in all conditions for this individual bat (see Methods, Results).

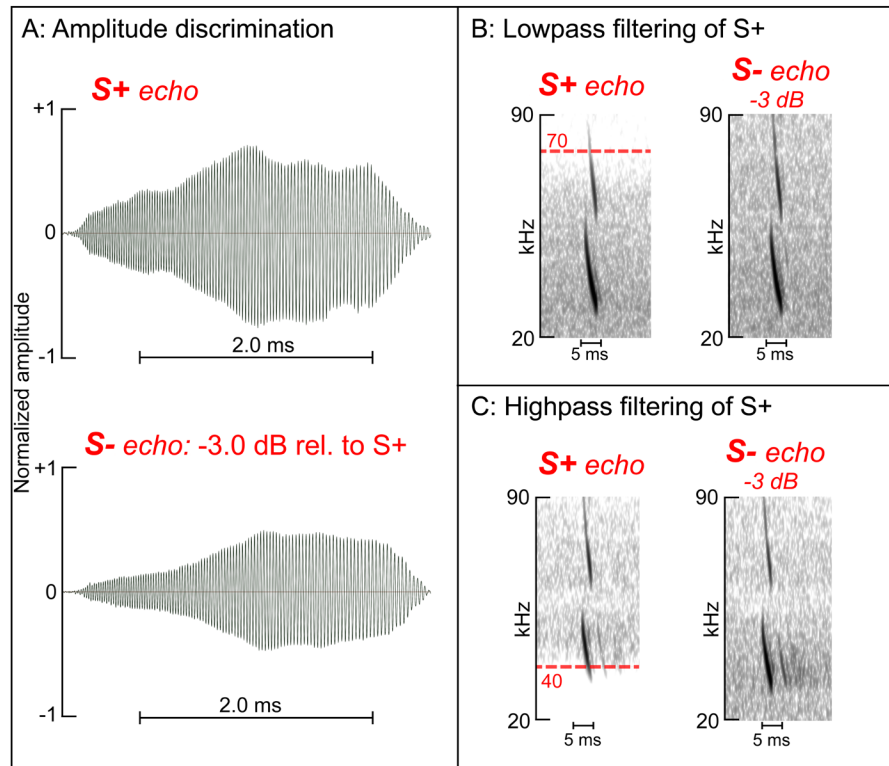

335

336

### 337 E. Data analysis and availability

338 Statistical tests were performed using RStudio (2018) and G\*Power 3.1 (2019). All data are  
339 available in the Brown University data repository (<https://doi.org/10.26300/c974-0k69>).

340 Performance data of each bat were input into RStudio (2018) and performance was calculated as  
341 the proportion of trials on which the bat responded correctly, per condition. Using a custom R

342 script, mean performance ( $p$ ) and binomial standard deviation ( $SD = \sqrt{npq}$ , where  $q = 1 - p$ )

343 were calculated for each condition, collapsing across bats. Two-tailed exact binomial tests were

344 run to compare performance across conditions. In total, five binomial tests were run: one to

345 compare mean performance in the baseline amplitude discrimination to chance (0.50), and four

346 to compare mean performance in the baseline amplitude discrimination to mean performance in  
347 each of the filtering conditions. The statistical power of each exact binomial test, as a function of  
348 the number of trials collected and the proportions compared, was calculated with post hoc power  
349 analyses run in G\*Power 3.1 (2020).

350

### 351 **III. RESULTS**

#### 352 **A. Amplitude discrimination limits and terminal frequencies**

353 After 8-14 weeks of training (and decreasing amplitude differences between stimuli), none  
354 of the five bats were able to discriminate between S+ and S- echoes on the basis of amplitude  
355 (performance was <75% correct for two consecutive days). This S+:S- amplitude difference was  
356 defined as the amplitude discrimination limit (ADL) for each bat. Fig. 2 and Table 1 show the  
357 ADL reached by each bat: two bats reached an ADL of -3.0 dB, one bat -4.5 dB, and two bats -  
358 6.0 dB. Once a bat reached its ADL, the mean terminal frequency (TF) of its calls was calculated  
359 by averaging the TF of all calls emitted during one trial. These individual TF measurements  
360 affected the filtering for later highpass (HP) conditions; HP filtering was set to 15 kHz above the  
361 TF of each individual bat. Table 1 shows each bat's ADL, calculated mean TF, and the filtering  
362 settings used for that bat.

363

#### 364 **FIG 3. Bat performance on amplitude discrimination task over training period.**

365 Performance of each individual bat (different shapes, color available online) on the amplitude  
366 discrimination task over the course of training is plotted as a percentage of all trials performed at  
367 each amplitude difference level. Over 8-14 weeks of training, the attenuation of the S- echo  
368 (relative to the stronger S+ echo) was progressively decreased in steps of 0.5-5 dB, until the

369 point at which the bat showed <75% discrimination performance for two consecutive days. Error  
 370 bars indicate  $\pm 1$  binomial standard deviation.

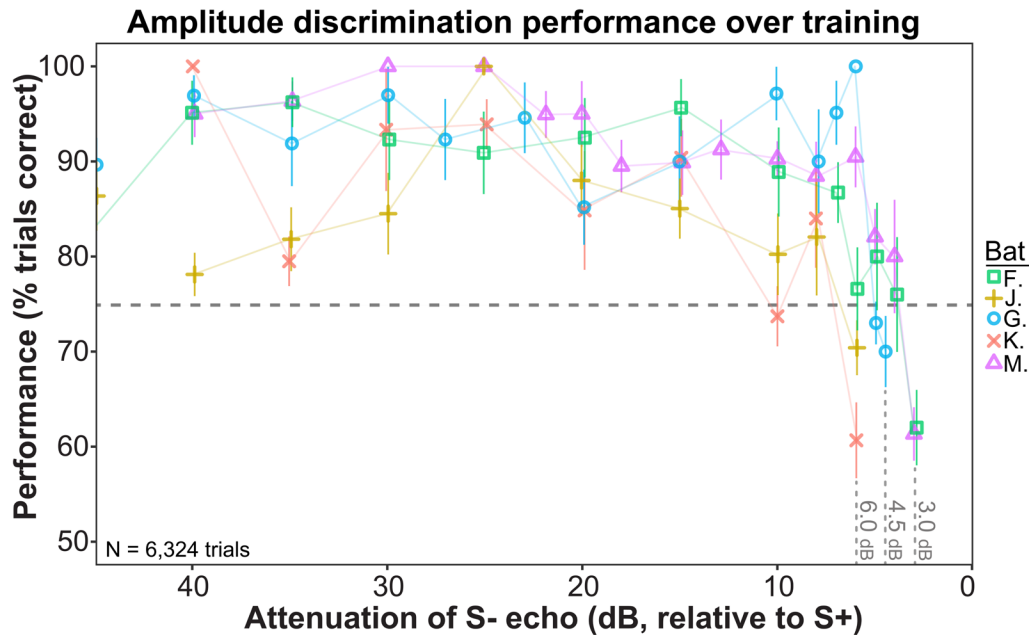

371

372 **TABLE 1. Amplitude discrimination limits (ADL) and filtering settings for individual bats.**

373 ADL describes the relative attenuation of the S- echo (relative to the S+ echo) at which that bat's

374 discrimination performance fell below 75% correct. HP filter frequency was set at 15 kHz above

375 the terminal frequency (TF) of each individual bat's echolocation calls, determined by averaging

376 the TF of all calls emitted throughout one trial in the baseline condition. LP filter frequency was

377 the same for all bats (70 kHz).

|                                   | Bat M. | Bat K. | Bat F. | Bat J. | Bat G. |
|-----------------------------------|--------|--------|--------|--------|--------|
| <b>ADL (dB of S- attenuation)</b> | -3.0   | -6.0   | -3.0   | -6.0   | -4.5   |
| <b>Mean TF (kHz)</b>              | 25.0   | 22.0   | 22.8   | 21.0   | 21.6   |
| <b>HP filter frequency (kHz)</b>  | 40     | 37     | 37.8   | 37     | 37.6   |
| <b>LP filter frequency (kHz)</b>  | 70     | 70     | 70     | 70     | 70     |

378

379 **B. Statistical power**

380 Due to state-mandated COVID-19 restrictions, we were unable to collect the full number of

381 planned trials from each bat across conditions. Table 2 outlines how many trials were collected

382 in each condition from each bat, as well as the calculated statistical power achieved for each  
383 condition across all bats (calculated using G\*power 3.1 software, assuming  $\alpha = 0.05$ ). Power for  
384 the baseline condition was calculated for a two-tailed exact binomial test comparing the baseline  
385 proportion of successes to chance (0.50). Statistical power for each filtering condition was  
386 calculated for a two-tailed exact binomial test comparing the proportion of successful trials in the  
387 experimental condition to the proportion of successes in the baseline discrimination condition.  
388 All calculations indicate that ensuing exact binomial tests have statistical power above 0.80 ( $P <$   
389 0.05).

390

391 **TABLE 2. Number of trials achieved in each condition and corresponding statistical**  
392 **power.** Post hoc power analyses were conducted to ensure that exact binomial tests had  
393 sufficient statistical power given the number of trials collected.

| Condition | Total # of trials | Power              | # trials (Bat M.) | # trials (Bat K.) | # trials (Bat F.) | # trials (Bat J.) | # trials (Bat G.) |
|-----------|-------------------|--------------------|-------------------|-------------------|-------------------|-------------------|-------------------|
| Baseline  | 750               | 1.0, $p = 0.0445$  | 150               | 150               | 150               | 150               | 150               |
| S- HP     | 600               | 0.99, $p = 0.0464$ | 150               | 0                 | 150               | 150               | 150               |
| S+ HP     | 436               | 1.0, $p = 0.0415$  | 150               | 136               | 150               | 0                 | 0                 |
| S- LP     | 350               | 0.99, $p = 0.0457$ | 150               | 150               | 0                 | 50                | 0                 |
| S+ LP     | 450               | 0.86, $p = 0.0448$ | 150               | 0                 | 150               | 0                 | 150               |

394

### 395 C. Discrimination performance

396 Fig. 4 shows the performance of all bats in each of the discrimination conditions, as the  
397 percentage of successful trials in each condition. All comparisons between conditions were  
398 analyzed using two-tailed exact binomial tests. In the baseline amplitude discrimination  
399 condition, in which bats responded to the stronger of two echoes (S+) at their specified ADL (see  
400 Table 1), mean performance was  $63.33\% \pm 1.76\%$ , significantly higher than chance ( $P < 0.001$ ).  
401 When S- was highpass filtered such that its lowest frequencies were removed, the bats'

402 performance increased significantly to  $76.33\% \pm 1.74\%$  ( $P < 0.001$ ). When S- was unfiltered and  
403 S+ was instead highpass filtered, such that the lowest frequencies of S+ were removed, the bats'  
404 performance decreased significantly from baseline performance to  $32.34\% \pm 2.24\%$  ( $P < 0.001$ ),  
405 despite the fact that S+ had a higher amplitude than S- in this condition. When S+ was left  
406 unfiltered and S- was lowpass filtered to remove its highest frequencies, the bats' performance  
407 again improved significantly relative to baseline performance, to  $73.71\% \pm 2.35\%$  ( $P < 0.001$ ).  
408 When S- was unmodified and S+ was instead lowpass filtered, performance relative to baseline  
409 decreased significantly to  $56.22\% \pm 2.34\%$  ( $p = 0.002$ ).

410

411 **FIG 4. Performance of all bats in amplitude discrimination task.**

412 Baseline discrimination (grey bar) required responding to the stronger of two simultaneously-  
413 presented echoes. An example echo spectrogram (black) lies horizontally above the plot, with  
414 frequency in kHz plotted on the top axis and colored dashed lines indicating at what frequency  
415 echoes were filtered (highpass filter values vary slightly by bat; see Table 1). Highpass filtering  
416 (red shading; color online) removed the lower 15 kHz of echo frequencies, and lowpass filtering  
417 (blue shading; color online) removed the upper end of frequencies. Green symbols (color online)  
418 show performance of individual bats on each condition, and error bars indicate  $\pm 1$  binomial  
419 standard deviation. Performance relative to baseline increased or decreased predictably based on  
420 the filtering of echoes. The pattern of results indicates that the upper and lower frequencies  
421 contribute to echo identification in separate, doubly dissociated ways. Grey dashed lines  
422 connecting columns indicate significance of exact binomial tests: \*\* =  $P < 0.001$ , \* =  $P < 0.01$ .

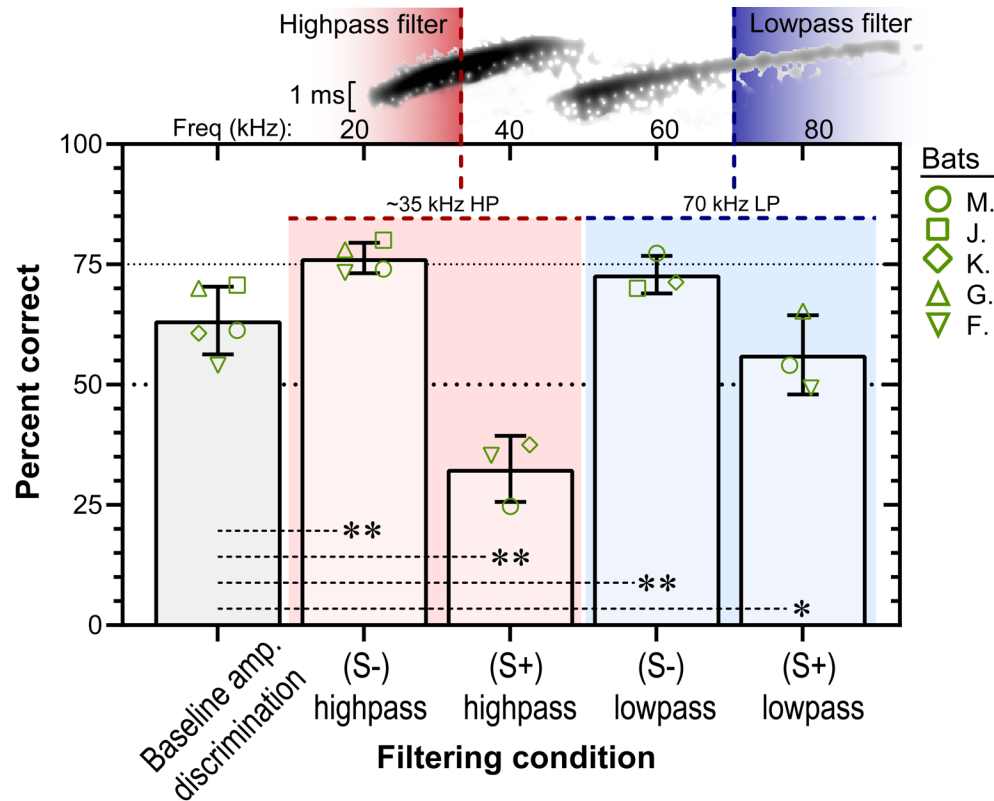

423

424

#### 425 IV. DISCUSSION

##### 426 A. Amplitude discrimination performance is predictably affected by frequency filtering

427 As hypothesized, bats' performance on the amplitude discrimination task on which they  
428 were trained (respond to S+, the stronger of two simultaneously-presented echoes; Fig. 1) was  
429 affected by the high- or lowpass filtering of the S+ and S- echoes. When S-, the weaker of the  
430 two echoes, was highpass filtered, the bats' mean discrimination performance increased from  
431 63% to 76%. Attenuating the lower frequencies of an incoming echo drastically disrupts the bat's  
432 ability to perceive the precise delay (distance) of an ensounded target (Bates and Simmons, 2011;  
433 Ming *et al.*, 2021). In the current experiment, attenuating just the bottom 10-15 kHz of S-  
434 resulted in an overall simpler S+/S- discrimination task for the bat and performance increased,  
435 despite the fact that the S- echo still contained a majority of its bandwidth and the same amount

436 of acoustic energy as in the baseline condition. When the S- echo was instead lowpass filtered,  
437 mean discrimination performance also increased significantly, from 63% to 73%. Lowpass  
438 filtering of FM2 of incoming echoes, using a variety of filtering methods, has been shown to  
439 defocus the bat's percept of echoes, making it difficult for them to determine the pulse-echo  
440 delay of filtered echoes and abolishing any masking effect the echo may have had before  
441 (Simmons et al., 2004; Stamper *et al.*, 2009; Bates and Simmons, 2010; Bates *et al.*, 2011). The  
442 same performance effect was seen here, as the bats were significantly less likely to perceive S- as  
443 the stronger of the two echoes when it was lowpass filtered (despite having the same amount of  
444 acoustic energy as when unfiltered). However, performance increased less in this condition than  
445 when S- was highpass filtered. This may be a result of the asymmetric perceptual roles of the  
446 bat's harmonics: while filtering of the higher frequencies mimics off-axis clutter and results in  
447 defocusing of the bat's sonar image, filtering the lower frequencies more drastically inhibits the  
448 bat's perception of incoming echoes. This is also seen in the bats' performance when S+, the  
449 higher amplitude echo, was highpass filtered. Mean performance decreased from 63% to 32%,  
450 showing that the bats actually reversed which echo they responded to, walking towards the  
451 weaker of the two echoes a majority of the time. The bats had a difficult time even perceiving the  
452 presence of the S+ echo, despite the fact that it remained an overall stronger acoustic signal than  
453 the S- echo. Anecdotally, the authors can report that all three bats that took part in that condition  
454 generally chose the S- echo quickly and with no hesitation, despite the continued lack of rewards  
455 for choosing that echo. These results once again highlight the disproportionate relevance of the  
456 lowest frequencies of the bat's wideband FM calls to the bat's biosonar perceptual system. Bates  
457 and Simmons (2010) found a similar reversal of discrimination performance when they highpass  
458 filtered their S+ echo at 66 kHz, such that it only contained FM2. In the current task, it took a

459 much smaller amount of highpass filtering (set at 37-40 kHz, removing only the lowest ~10-15  
460 kHz) for the bats to reverse discrimination performance.

461 In the final permutation of filtering conditions, S+ was lowpass filtered at 70 kHz, resulting  
462 in a significant decrease in mean performance from 63% to 56%. The decrease in performance  
463 indicates that the bats had a harder time discriminating which echo was the stronger of the two. It  
464 can be assumed that the S+ echo was perceptually defocused as a result of its lowpass filtering,  
465 but this defocusing did not cause the bats to reverse performance to respond to S-, as when S+  
466 was highpass filtered. Nonetheless, it became more difficult for the bats to decide which of the  
467 two echoes was stronger. One possible explanation for this is that the perception of an object's  
468 size (partially a function of the reflected echo's amplitude) also becomes defocused when  
469 lowpass filtered, along with the object's perceived distance becoming blurred. This would result  
470 in small differences in object size being more difficult to discriminate, as seen in the S+ lowpass  
471 filtering condition. In this condition, the lowpass filtered S+ echoes were still recognized as  
472 echoes of comparable amplitude (indicated by the bats' performance not falling below 50%), but  
473 the precise amplitude of the S+ echo may have been difficult for the bat to perceive, leading to  
474 lower discrimination performance.

475 It is of interest to note that the bats' performance increased and decreased on the amplitude  
476 discrimination task following similar patterns as previous delay experiments, despite the fact that  
477 spectral filtering of the echoes presumably disrupts the bat's percept of the echo's delay, not its  
478 strength (i.e. its perceived size). This may be due to the fact that the echoes in the current task  
479 were presented at a constant delay throughout training and the experiment. Filtering of echoes  
480 affects the bats' perception of that echo's delay, which may make them less likely to respond to  
481 that echo regardless of the echo's amplitude. For example, the bats' increased performance in the



482 S- highpass condition (relative to baseline) may be due to additive perceptual effects: not only is  
483 the S- echo slightly weaker than the S+ echo it has been trained to respond to, but now it also has  
484 a poorly-defined delay of *approximately* 4.84 ms, whereas S+ still has the well-defined delay of  
485 4.84 ms, which it has had throughout the bat's training. Thus, S+ is easier to choose as the  
486 correct echo because it is both stronger *and* has the precise delay the bat was trained to respond  
487 to. A possible control for this would be to train the bats to discriminate two echoes with different  
488 amplitudes but randomly variable delays, such that targets are presented within a certain range of  
489 pulse-echo delay values, which is changed randomly across trials or days. This would ensure that  
490 bats would learn to discriminate the two echoes based *only* on amplitude, without also inherently  
491 learning to respond to the specific pulse-echo delay values the echoes are presented at (as they  
492 may have in the current task). This would allow us to more precisely isolate the effects of  
493 filtering on amplitude discrimination without the possible confound of the bats learning to  
494 respond to specific pulse-echo delays (and thus not responding to echoes that do not have that  
495 precise pulse-echo delay). Unfortunately, COVID-19 restrictions made running these further  
496 controls not possible.

## 497 **B. Clutter rejection mechanisms are versatile across perceptual contexts**

498 These results highlight the flexibility of the big brown bat's clutter rejection mechanisms,  
499 which help them perceptually discriminate central target echoes from peripheral clutter echoes in  
500 the cluttered foraging scenarios among foliage that big brown bats are likely to encounter (Bates  
501 *et al.*, 2011). When foraging among clutter, these bats will rapidly emit short, wideband FM calls  
502 during their pursuit and capture of small flying insects (Griffin, 1958; Neuweiler, 2000), within  
503 meters or centimeters of surrounding foliage. The big brown bat's echolocation beam is about  
504 110 degrees wide (-6 dB width; Hartley and Suthers, 1989), which results in the bat receiving a

505 large number of echoes from all nearby surfaces to the front of the bat, not just the echoes from  
506 whatever surface it is directly aiming at. This constitutes the bat's perceptual clutter problem: the  
507 bat must, quickly and accurately, perceive the precise location of an insect measuring no more  
508 than 1-3 cm in size based on the weak echoes the insect reflects, while also receiving a cascade  
509 of relatively stronger echoes created by surrounding foliage; these echoes may be offset from the  
510 insect's location by any number of degrees, and may have higher, lower, or identical pulse-echo  
511 delays (from the bat's perspective) as the insect echoes.

512       Importantly, not all frequencies of the bat's FM calls are emitted with equal strength across  
513 the bat's echolocation beam. The higher frequencies are emitted most strongly within the central  
514 60°, while the lower frequencies are emitted almost equally strongly across the entire  
515 echolocation beam (Hartley and Suthers, 1989; Bates *et al.*, 2011). The result is that when a bat  
516 echolocates a nearby object located directly ahead of it, the target returns an echo that contains  
517 all of the frequencies in the bat's original call. When a bat echolocates a nearby object that is  
518 located off-center, it instead returns an echo with attenuated higher frequencies relative to the  
519 low frequencies. This cue is very helpful for the bat, as psychophysical tasks have shown that  
520 attenuated FM2 frequencies result in an echo whose delay cannot be easily resolved (Bates *et al.*,  
521 2011). Thus, objects that are ensonified by the center of the bat's beam (such as an insect being  
522 tracked), are well-resolved: the bat perceives its distance and location with a high degree of  
523 accuracy. Objects that are ensonified by the periphery of the bat's beam (such as foliage to the  
524 side of the insect) reflect a lowpass filtered echo, which is still detectable but is defocused and  
525 more difficult to resolve its precise delay; in this way, these peripheral echoes do not mask the  
526 central object of interest, even if at similar pulse-echo delays and amplitudes.

527 Previous studies, using a variety of temporal discrimination tasks, have shown the efficacy  
528 of these clutter rejection mechanisms in defocusing lowpass filtered echoes so that the delay of  
529 unfiltered echoes can be perceived with a high degree of accuracy (Moss and Schnitzler, 1989;  
530 Simmons *et al.*, 2004; Stamper *et al.*, 2009; Bates and Simmons, 2010; Bates *et al.*, 2011). Here,  
531 we extended these techniques of high- and lowpass echo filtering to an amplitude discrimination  
532 task and observed changes in discrimination performance that were in line with the conclusions  
533 from previous studies: lowpass filtering of a “clutter” or “distractor” echo (S-) led to the bats  
534 more successfully perceiving and choosing the “target” echo (S+), while highpass filtering either  
535 led to better discrimination performance (if S- was highpass filtered) or a reversal in performance  
536 (if S+ was highpass filtered). The current discrimination task the bats were trained on constituted  
537 a new perceptual context that has not been tested before, wherein both echoes from either side  
538 were presented simultaneously after every call, were spectrally identical, and had identical pulse-  
539 echo delay. The pattern of performance in the current task indicates that the bats’ perceptual  
540 clutter rejection mechanisms are adaptive not only when discriminating targets based on their  
541 delay (i.e. distance), but also when discriminating targets based on their amplitude (i.e. their  
542 size). Additionally, our results suggest that these clutter rejection mechanisms may not just  
543 modify their perception of echo distance, but also their perception of object size (as a function of  
544 echo amplitude).

545

## 546 **ACKNOWLEDGEMENTS**

547 We thank Brandon Yeoh for assistance in bat training and data collection. This work was  
548 supported by an Office of Naval Research Multidisciplinary University Research Initiative grant

549 (N00014-17-1-2736, J.A.S. and A.M.S.). A.T. is supported by a National Science Foundation

550 Graduate Research Fellowship.

551

552 **References**

- 553 Bates, M. E., and Simmons, J. A. (2010). “Effects of filtering of harmonics from biosonar echoes  
554 on delay acuity by big brown bats (*Eptesicus fuscus*),” *J. Acoust. Soc. Am.* 128(2), 936.  
555 <https://doi.org/10.1121/1.3459823>
- 556 Bates, M. E., Simmons, J. A., and Zorikov, T. V. (2011). “Bats use echo harmonic structure to  
557 distinguish their targets from background clutter,” *Science* 333(6042), 627–630.  
558 <https://doi.org/10.1126/science.1202065>
- 559 Boonman, A., and Ostwald, J. (2007). “A modeling approach to explain pulse design in bats,”  
560 *Biol. Cyber.* 97(2), 159–172. <https://doi.org/10.1007/s00422-007-0164-2>
- 561 Denny, M. (2007). *Blip, ping & buzz : making sense of radar and sonar*. Johns Hopkins  
562 University Press.
- 563 Gellermann, L. W. (1933). “Chance orders of alternating stimuli in visual discrimination  
564 experiments,” *Pedagogical Sem. J. Gen. Psych.* 42(1), 206–208.  
565 <https://doi.org/10.1080/08856559.1933.10534237>
- 566 Ghose, K., and Moss, C. F. (2003). “The sonar beam pattern of a flying bat as it tracks tethered  
567 insects,” *J. Acoust. Soc. Am.* 114(2), 1120–1131. <https://doi.org/10.1121/1.1589754>
- 568 Griffin, D. R. (1958). *Listening in the Dark* (Yale University Press).
- 569 Hartley, D. J., and Suthers, R. A. (1989). “The sound emission pattern of the echolocating bat,  
570 *Eptesicus fuscus*,” *J. Acoust. Soc. Am.* 85(3), 1348–1351. <https://doi.org/10.1121/1.397466>
- 571 Jones, G. (2008). “Sensory Ecology: Echolocation calls are used for communication,” *Curr. Biol.*  
572 18(1), R34–R35. <https://doi.org/10.1016/J.CUB.2007.10.056>
- 573 Lawrence, B. D., & Simmons, J. A. (1982). “Measurements of atmospheric attenuation at  
574 ultrasonic frequencies and the significance for echolocation by bats.” *The Journal of the*

- 575 *Acoustical Society of America*, 71(3), 585–590. <https://doi.org/10.1121/1.387529>
- 576 Ming, C., Haro, S., Simmons, A. M., and Simmons, J. A. (2021). “A comprehensive  
577 computational model of animal biosonar signal processing,” *PLoS Comp. Biol.* 17(2),  
578 e1008677. <https://doi.org/10.1371/JOURNAL.PCBI.1008677>
- 579 Moss, C. F., and Schnitzler, H. U. (1989). “Accuracy of target ranging in echolocating bats:  
580 acoustic information processing,” *J. Comp. Physiol. A* 165(3), 383–393.  
581 <https://doi.org/10.1007/BF00619357>
- 582 Neuweiler, G. (2000). *The Biology of Bats* (Oxford University Press).
- 583 Simmons, J. A. (1973). “The resolution of target range by echolocating bats,” *J. Acoust. Soc.*  
584 *Am.* 54(1), 157–173. <https://doi.org/10.1121/1.1913559>
- 585 Simmons, J. A., and Vernon, J. A. (1971). “Echolocation: Discrimination of targets by the bat,  
586 *Eptesicus fuscus*,” *J. Exp. Zool.* 176, 315–328.
- 587 Simmons, J. A., Moss, C. F., and Ferragamo, M. (1990). “Convergence of temporal and spectral  
588 information into acoustic images of complex sonar targets perceived by the echolocating bat,  
589 *Eptesicus fuscus*,” *J. Comp. Physiol. A Sens. Neural Behav. Physiol.* 166(4), 449–470.  
590 <https://doi.org/10.1007/BF00192016>
- 591 Simmons, J. A., and Stein, R. A. (1980). “Acoustic imaging in bat sonar: Echolocation signals  
592 and the evolution of echolocation,” *J. Comp. Physiol. A* 135(1), 61–84.  
593 <https://doi.org/10.1007/BF00660182>
- 594 Simmons, J. A., Howell, D. J., and Suga, N. (1975). “Information content of bat sonar echoes,”  
595 *Amer. Sci.* 63(2), 204–215.
- 596 Simmons, J. A., Neretti, N., Intrator, N., Altes, R. A., Ferragamo, M. J., and Sanderson, M. I.  
597 (2004). “Delay accuracy in bat sonar is related to the reciprocal of normalized echo

598 bandwidth, or Q,” Proc. Natl. Acad. Sci. USA 101(10), 3638–3643.  
599 <https://doi.org/10.1073/pnas.0308279101>  
600 Stamper, S. A., Bates, M. E., Benedicto, D., and Simmons, J. A. (2009). “Role of broadcast  
601 harmonics in echo delay perception by big brown bats,” J. Comp. Physiol. A Sens. Neural  
602 Behav. Physiol. 195(1), 79–89. <https://doi.org/10.1007/s00359-008-0384-5>  
603 Stilz, W. P., and Schnitzler, H. U. (2012). “Estimation of the acoustic range of bat echolocation  
604 for extended targets.” J. Acoust. Soc. Am. 132, 1765–1775.  
605 Surlykke, A., and Moss, C. F. (2000). “Echolocation behavior of big brown bats, *Eptesicus*  
606 *fuscus*, in the field and the laboratory,” J. Acoust. Soc. Am. 108(5), 2419–2429.  
607 <https://doi.org/10.1121/1.1315295>  
608
